# Supplementary material for: Bacillus Calmette–Guérin-Induced Human Mast Cell Activation Relies on IL-33 Priming
Source: MDPI journal article supplement (doi:10.3390/ijms23147549), 2022-07-07
Supplement: s1 [file s1]

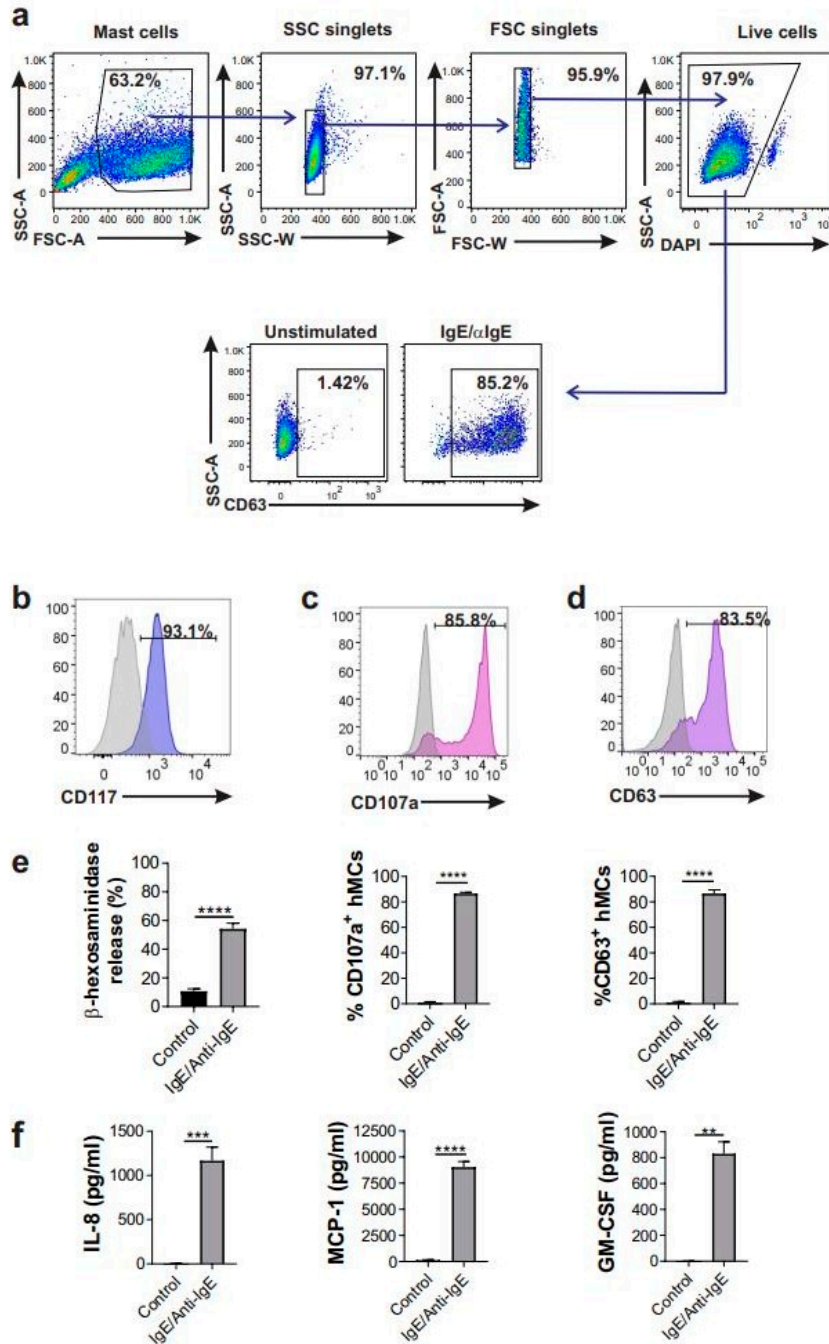

**Supplementary Figure S1. Blood progenitors-derived human mast cells: Gating strategy, purity and maturity.** Hematopoietic hMC progenitors were isolated from PBMCs from different donors and differentiated in the presence of cytokines into mature hMCs. After 8 weeks of differentiation and maturation, hMCs were analyzed for purity and maturity before experiments. hMCs were sensitised overnight with IgE (1  $\mu$ g/mL), washed and either left untreated (control) or stimulated with anti-IgE antibody (1  $\mu$ g/mL) for 1h to investigate degranulation, or 8h to analyze cytokine secretion. After 1h IgE incubation cells were stained with anti-CD117, anti-CD63 and anti-CD107a antibody and analysed by flow cytometry. **(a)** Gating strategy used for flow cytometry analysis. Cells were gated using side scatter (SSC-A) and forward scatter (FSC-A) parameters. Single cells were selected using SSC- A/SSC-W and FSC-A/FSC-W parameters, while dead cells were discriminated using DAPI. Live cells were used for further analysis including degranulation (CD63<sup>+</sup> cells) and cell surface markers. Lower panel shows a representative example of cellular gating on CD63 positive cells compared to an unstimulated control. **(b, c and d)** Histograms show CD117 (blue), CD107a (pink) and CD63 (purple) positive cell counts compared to unstained controls (grey). Graphs show hMC degranulation as percentage of **(c)** CD107a<sup>+</sup> and **(d)** CD63<sup>+</sup> hMCs. **(e)** Degranulation was confirmed with  $\beta$ -hexosaminidase release assay. **(f)** After 8h IgE incubation, supernatants were collected and IL-8, MCP-1 and GM-CSF release was measured. Each graph shows a representative experiment from 3 independent experiments. 3 different donors were used for hMC experiments from 7 different cell cultures. Statistical analysis was done using *t*-test ( $p = ** < 0.01$ ,  $*** < 0.0001$ ,  $**** < 0.00001$ ).

**a**

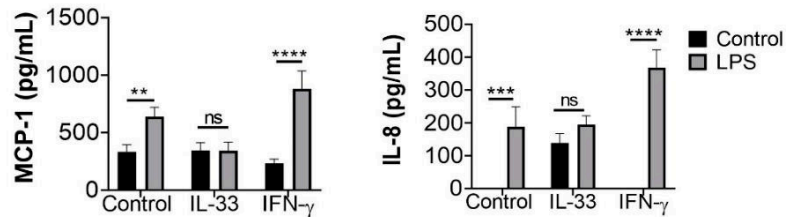

**b**

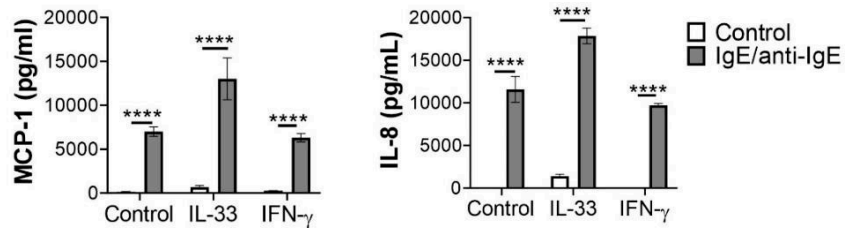

**Supplementary Figure S2. hMC mediator secretion upon LPS stimulation and IgE-Fc $\epsilon$ R1 crosslinking is enhanced by IL-33.** hMCs were treated with IL-33 (50 ng/ml) or IFN- $\gamma$  (50 ng/ml) for 24h, or left untreated (control). **(a)** Cells were washed and stimulated with LPS for 16 h or **(b)** sensitized overnight with IgE (100  $\mu$ g/ml), and stimulated with an anti-IgE (100  $\mu$ g/ml) antibody for 16h. After incubation, supernatants were collected and MCP-1 and IL-8 were measured using the CBA multiplex assay. Each graph shows a representative experiment from 3 independent experiments. Statistical analyses were performed using one-way ANOVA analysis followed by a Tukey's multiple comparison test (\*\*\*\* $p$ <0.0001, \*\*\* $p$ <0.001, \*\* $p$ <0.01).
